# Supplementary material
Source: HighWire-hosted journal article supplement (https://www.cmajopen.ca/highwire/filestream/87395/field_highwire_adjunct_files/3/2020-0152-4-at.pdf)
Supplement: 2020-0152-4-at.pdf [file 2020-0152-4-at.pdf]

**Appendix 4 (as supplied by authors).**

**Supplemental Table: Characteristics of respondent organizations, comparing those with 100% complete responses versus those with 85-99% complete responses.**

| Organization features              | Statistics                                                       |                                                                |
|------------------------------------|------------------------------------------------------------------|----------------------------------------------------------------|
|                                    | Organizations with complete <sup>+</sup> survey response (n=118) | Organizations with at least one missing survey response (n=23) |
| Organization Type                  |                                                                  |                                                                |
| Family health team                 | 51 (43.22 %)                                                     | 11 (47.83 %)                                                   |
| Community health centre            | 51 (43.22 %)                                                     | 10 (43.48 %)                                                   |
| Nurse practitioner-led clinic      | 10 (8.48 %)                                                      | 0 (0.0 %)                                                      |
| Aboriginal health access centre    | 3 (2.54 %)                                                       | 0 (0.0 %)                                                      |
| Missing                            | 3 (2.54 %)                                                       | 2 (8.70 %)                                                     |
| Organization Affiliations          |                                                                  |                                                                |
| Academic and teaching centre       | 32 (27.12 %)                                                     | 4 (17.39 %)                                                    |
| Teaching centre Only               | 43 (36.44 %)                                                     | 7 (43.48 %)                                                    |
| Non-teaching centre                | 40 (33.90 %)                                                     | 10 (30.43 %)                                                   |
| Missing                            | 3 (2.54 %)                                                       | 2 (8.70 %)                                                     |
| Organization Location              |                                                                  |                                                                |
| Urban                              | 65 (55.08 %)                                                     | 12 (52.17 %)                                                   |
| Rural                              | 43 (36.44%)                                                      | 8 (34.78 %)                                                    |
| Other                              | 8 (6.78 %)                                                       | 1 (4.35 %)                                                     |
| Missing                            | 2 (1.69 %)                                                       | 2 (8.70 %)                                                     |
| Years Organization in Operation*   | 11 (16.75) [6.78%]                                               | 11 (16.5) [17.39%]                                             |
| Number of Patients Served*         | 8,000 (11,950) [5.08%]                                           | 11,000 (14,100) [13.04%]                                       |
| Number of Primary Care Providers*  | 10 (10) [4.24%]                                                  | 11.5 (11.25) [13.04%]                                          |
| Number of Interprofessional Staff* | 15.5 (18.25) [6.38%]                                             | 12 (18.24) [13.04 %]                                           |
| Ratio of Patients to Staff*        | 320 (314.29) [7.63%]                                             | 361 (464.4) [13.04 %]                                          |

\*median (IQR) [%missing]

<sup>+</sup>Complete means survey respondents that provided responses to all questions in the survey
